# Supplementary material
Source: PubMed Central journal article supplement (PMC4882230)
Supplement: NIHMS776317-supplement-Graphic_Abstract.pdf [file NIHMS776317-supplement-Graphic_Abstract.pdf]

# 3c CRISPR

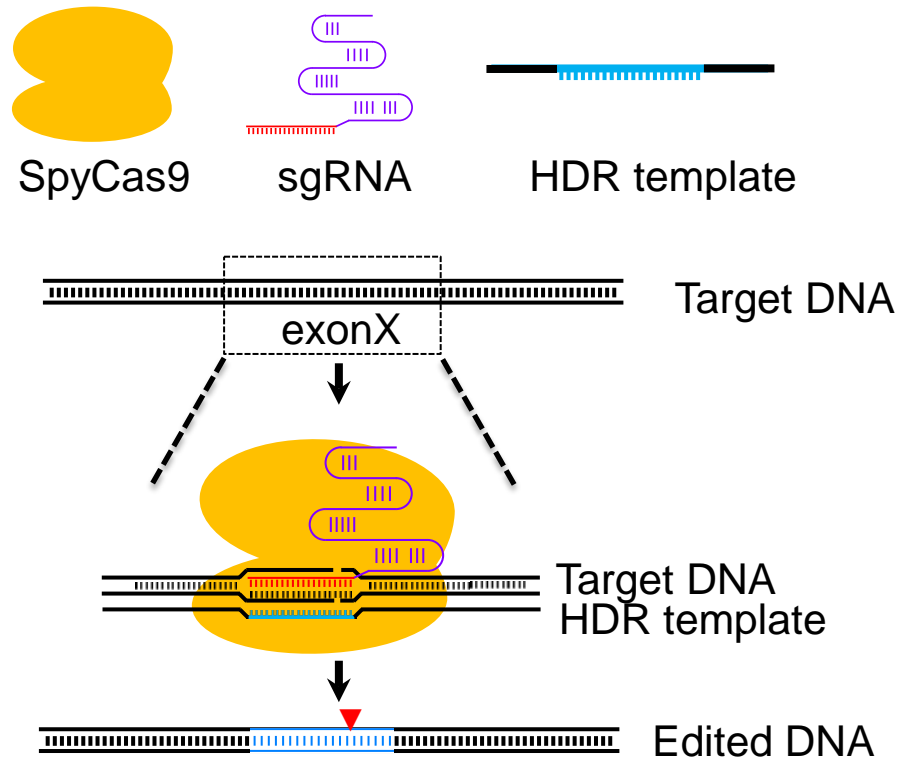

## Precise genome editing

- Gene correction
- SNP modeling
- Conditional allele
- Epitope tagging
- Fine mapping regulatory element
